# Supplementary figures and images for: Targeted Sequencing of Sorted Esophageal Adenocarcinoma Cells Unveils Known and Novel Mutations in the Separated Subpopulations
Source: PubMed Central journal article supplement — Clin Transl Gastroenterol. 2020 Sep 21;11(9):e00202. doi: 10.14309/ctg.0000000000000202 (PMC7508445; doi:10.14309/ctg.0000000000000202), 2020-09-21

**A*****TP53* p.R273H**

|       | K+/V-                                                                                   | unsorted                                                                                 |
|-------|-----------------------------------------------------------------------------------------|------------------------------------------------------------------------------------------|
| EAC6  | 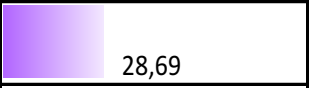 28,69 |  16,28 |
| EAC11 |  99,91 | not available                                                                            |
| EAC26 |  54,59 |  16,76 |

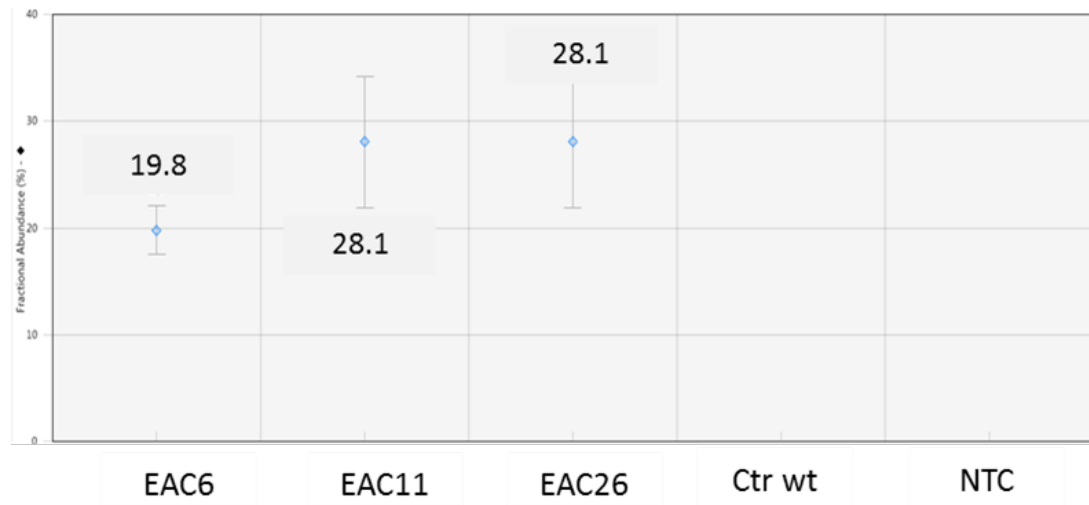**B*****CDKN2A* p.R58\***

|      | K+/V-                                                                                     | unsorted                                                                                  |
|------|-------------------------------------------------------------------------------------------|-------------------------------------------------------------------------------------------|
| EAC4 | 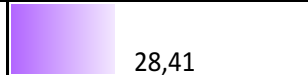 28,41 |  10,00 |

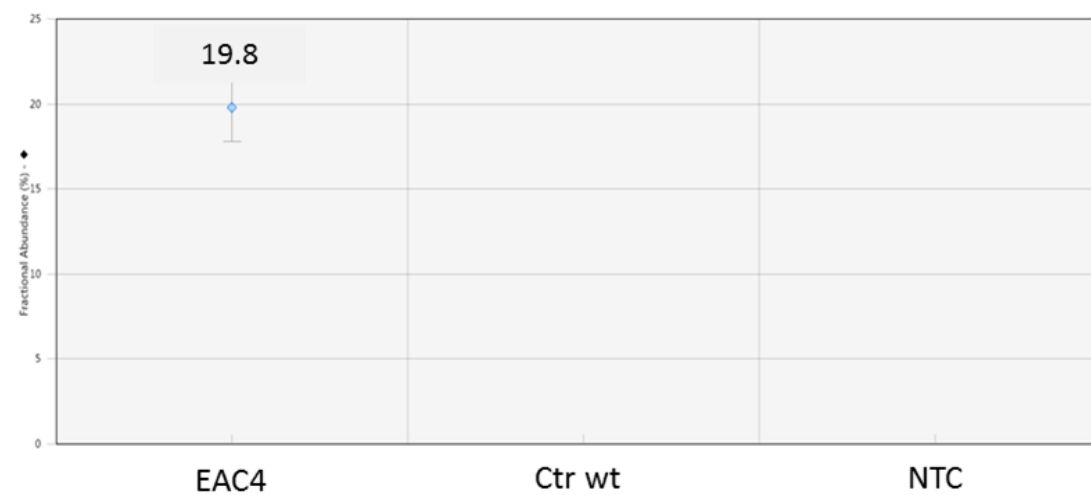

Supplement: ct9-11-e00202-s002.pdf [file ct9-11-e00202-s002.pdf]
